# Supplementary material for: Cultivating ecological awareness in middle-school students through Ethno-STEM Project Based Learning: A Study from Lae-Lae Island
Source: Research Square preprint supplement (doi:10.21203/rs.3.rs-7644358/v1), 2025-11-11
Supplement: Supplementary file 1 [file 4087306a7e29ac393429d9a1.docx]

**[original version]**

**Ecological Awareness (Skala Likert)**

**Instruksi**: Silakan berikan penilaian (memberi tanda √) sesuai dengan pendapat Anda mengenai kebiasaan dan pilihan yang Anda lakukan sehari-hari dengan menggunakan skala Likert berikut:
1 = Sangat Tidak Setuju
2 = Tidak Setuju
3 = Netral
4 = Setuju
5 = Sangat Setuju

**Identitas**

Nama :

Jenis Kelamin :

Kelas :

Sekolah :

| **No** | **Pernyataan** | **Penilaian** | | | | |
| --- | --- | --- | --- | --- | --- | --- |
| **1** | **2** | **3** | **4** | **5** |
| **Aspek 1: Kebiasaan Konsumsi Makanan (Proyek: Jejak Karbon Makanan Lokal)** | | | | | | |
| 1 | Saya lebih memilih makanan lokal karena menghasilkan jejak karbon yang lebih rendah. |  |  |  |  |  |
| 2 | Saya lebih memilih makanan lokal karena menghasilkan jejak karbon yang lebih rendah. |  |  |  |  |  |
| 3 | Saya memahami bahwa makanan impor berkontribusi lebih besar terhadap emisi karbon |  |  |  |  |  |
| 4 | Saya berusaha mengurangi konsumsi makanan kemasan atau olahan dari luar pulau |  |  |  |  |  |
| 5 | Saya mulai membiasakan diri mengonsumsi makanan segar hasil produksi lokal |  |  |  |  |  |
| 6 | Saya mendiskusikan dampak lingkungan dari pilihan makanan bersama keluarga |  |  |  |  |  |
| **Aspek 2: Penggunaan Energi (Proyek: Pembangkit Listrik Tenaga Surya Mini)** | | | | | | |
| 7 | Saya tahu bahwa energi matahari adalah sumber energi terbarukan yang ramah lingkungan |  |  |  |  |  |
| 8 | Saya tertarik menggunakan alat bertenaga surya dalam kehidupan sehari-hari |  |  |  |  |  |
| 9 | Saya menyadari pentingnya mengurangi penggunaan listrik berbasis bahan bakar fosil |  |  |  |  |  |
| 10 | Saya mengetahui cara kerja dasar panel surya untuk menghasilkan listrik |  |  |  |  |  |
| 11 | Saya berusaha menghemat listrik di rumah untuk menjaga lingkungan |  |  |  |  |  |
| 12 | Saya mendukung penggunaan energi surya di daerah saya sebagai alternatif energi |  |  |  |  |  |
| **Aspek 3: Pengelolaan Sampah (Proyek: Bank Sampah Berbasis Biokonversi)** | | | | | | |
| 13 | Saya memilah sampah organik dan anorganik setiap hari |  |  |  |  |  |
| 14 | Saya memahami cara kerja bank sampah dan fungsinya bagi lingkungan |  |  |  |  |  |
| 15 | Saya tahu bahwa sampah organik bisa diolah menjadi kompos melalui biokonversi. |  |  |  |  |  |
| 16 | Saya merasa bertanggung jawab untuk mengurangi sampah rumah tangga |  |  |  |  |  |
| 17 | Saya tertarik mengikuti kegiatan pengolahan sampah menjadi pupuk atau bahan berguna |  |  |  |  |  |
| 18 | Saya menyadari bahwa pembakaran sampah merusak lingkungan dan kesehatan |  |  |  |  |  |
| **Aspek 4: Konservasi Air (Proyek: Teknologi Penyaring Air Tradisional)** | | | | | | |
| 19 | Saya menyadari pentingnya menjaga kebersihan sumber air di lingkungan saya |  |  |  |  |  |
| 20 | Saya tahu cara sederhana untuk menyaring air menggunakan bahan alami |  |  |  |  |  |
| 21 | Saya memahami bahwa air bersih harus dikelola dan digunakan secara hemat |  |  |  |  |  |
| 22 | Saya tidak membuang limbah atau deterjen ke saluran air umum |  |  |  |  |  |
| 23 | Saya terbiasa menutup kran saat tidak digunakan |  |  |  |  |  |
| 24 | Saya percaya bahwa teknologi tradisional bisa membantu penyediaan air bersih di pulau. |  |  |  |  |  |

**[english version]**

**Ecological Awareness Questionnaire (Likert Scale)**

Instructions: Please give a rating (check √) according to your opinion about the habits and choices you make in daily life using the following Likert scale:
1 = Strongly Disagree
2 = Disagree
3 = Neutral
4 = Agree
5 = Strongly Agree

Identity
Name :
Gender :
Class :
School :

| **No.** | **Statement** | **1** | **2** | **3** | **4** | **5** |
| --- | --- | --- | --- | --- | --- | --- |
|  | **Aspect 1: Food Consumption Habits (Project: Local Food Carbon Footprint)** |  |  |  |  |  |
| 1 | I prefer local food because it produces a lower carbon footprint. |  |  |  |  |  |
| 2 | I prefer local food because it produces a lower carbon footprint. |  |  |  |  |  |
| 3 | I understand that imported food contributes more to carbon emissions. |  |  |  |  |  |
| 4 | I try to reduce consumption of packaged or processed foods from outside the island. |  |  |  |  |  |
| 5 | I have started to make a habit of consuming fresh, locally produced food. |  |  |  |  |  |
| 6 | I discuss the environmental impact of food choices with my family. |  |  |  |  |  |
|  | **Aspect 2: Energy Use (Project: Mini Solar Power Plant)** |  |  |  |  |  |
| 7 | I know that solar energy is a renewable, environmentally friendly energy source. |  |  |  |  |  |
| 8 | I am interested in using solar-powered devices in daily life. |  |  |  |  |  |
| 9 | I realize the importance of reducing the use of fossil-fuel-based electricity. |  |  |  |  |  |
| 10 | I know the basic workings of solar panels for generating electricity. |  |  |  |  |  |
| 11 | I try to save electricity at home to protect the environment. |  |  |  |  |  |
| 12 | I support the use of solar energy in my area as an alternative energy source. |  |  |  |  |  |
|  | **Aspect 3: Waste Management (Project: Bioconversion-Based Waste Bank)** |  |  |  |  |  |
| 13 | I sort organic and inorganic waste every day. |  |  |  |  |  |
| 14 | I understand how a waste bank works and its function for the environment. |  |  |  |  |  |
| 15 | I know that organic waste can be processed into compost through bioconversion. |  |  |  |  |  |
| 16 | I feel responsible for reducing household waste. |  |  |  |  |  |
| 17 | I am interested in participating in activities that process waste into fertilizer or useful materials. |  |  |  |  |  |
| 18 | I realize that burning waste harms the environment and health. |  |  |  |  |  |
|  | **Aspect 4: Water Conservation (Project: Traditional Water-Filtration Technology)** |  |  |  |  |  |
| 19 | I realize the importance of keeping water sources clean in my surroundings. |  |  |  |  |  |
| 20 | I know simple ways to filter water using natural materials. |  |  |  |  |  |
| 21 | I understand that clean water must be managed and used sparingly. |  |  |  |  |  |
| 22 | I do not dispose of waste or detergents into public waterways. |  |  |  |  |  |
| 23 | I am used to turning off the tap when not in use. |  |  |  |  |  |
| 24 | I believe that traditional technology can help provide clean water on the island. |  |  |  |  |  |
