# Supplementary material for: Cultivating ecological awareness in middle-school students through Ethno-STEM Project Based Learning: A Study from Lae-Lae Island
Source: Research Square preprint supplement (doi:10.21203/rs.3.rs-7644358/v1), 2025-11-11
Supplement: Supplementary file 2 [file 568f6d93f5ddd70f20cfab28.xlsx]

## Sheet: Pre
No. Responden	Gender	Kelas	1	2	3	4	5	6	7	8	9	10	11	12	13	14	15	16	17	18	19	20	21	22	23	24
1	L	8	5	5	4	5	5	4	4	4	5	2	5	5	3	4	3	5	5	5	4	4	5	5	5	4
2	L	9	5	4	4	5	4	4	4	5	5	4	4	5	3	2	4	5	5	4	4	4	5	5	5	3
3	L	9	4	4	4	4	5	4	5	4	4	2	5	4	4	4	3	4	5	4	5	4	5	4	5	4
4	P	9	3	3	4	2	3	4	5	4	4	2	3	3	3	2	2	5	5	4	5	1	4	1	5	3
5	L	7	1	4	4	4	4	4	5	5	2	4	1	2	1	4	2	2	2	5	3	2	1	4	1	4
6	L	9	4	4	4	4	4	4	4	4	4	2	3	3	3	3	3	3	3	3	3	2	3	3	3	3
7	L	7	3	3	3	3	5	4	4	4	3	3	4	5	3	3	3	4	4	5	5	3	4	3	3	2
8	L	7	4	3	4	4	3	3	5	5	4	4	2	1	2	3	4	2	3	5	5	4	3	3	3	4
9	L	8	3	3	3	3	3	3	3	3	3	3	3	3	3	3	2	3	3	3	3	3	3	3	3	3
10	L	9	5	4	4	4	5	4	5	4	5	2	5	4	3	3	3	4	4	5	5	4	4	5	5	3
11	L	8	3	3	3	3	3	3	3	3	3	3	4	3	4	3	3	4	4	3	4	4	3	3	3	3
12	P	8	3	3	3	3	4	3	3	2	4	2	5	3	3	3	3	5	5	5	5	2	5	1	5	3
13	L	8	5	5	4	5	5	4	4	4	4	2	4	4	3	3	3	4	5	5	5	4	5	5	5	5
14	P	9	4	4	3	4	4	4	4	4	4	4	4	4	4	4	2	4	4	4	4	4	4	4	4	4
15	P	8	3	3	3	3	4	3	4	3	3	3	4	3	3	3	3	3	3	4	5	3	3	3	3	3
16	L	9	3	3	2	2	5	4	4	4	4	4	5	4	2	3	3	4	4	4	4	4	4	4	4	4
17	P	8	3	3	3	3	4	3	5	4	3	3	3	3	2	3	3	4	4	3	4	2	4	4	3	3
18	L	9	4	3	3	4	4	4	4	4	4	2	4	4	2	3	4	4	4	4	4	4	4	4	4	4
19	P	8	3	3	4	4	4	4	4	4	3	3	4	4	3	2	3	3	4	5	5	2	5	3	5	2
20	P	7	2	3	4	3	5	4	3	3	3	3	4	3	4	4	2	5	4	3	3	4	5	3	5	4
21	P	7	5	4	4	5	5	4	5	4	5	2	3	4	2	3	4	1	3	5	5	3	5	4	5	4
22	P	7	5	5	4	5	5	4	5	5	5	2	5	4	3	4	4	5	5	5	5	3	5	5	5	4
23	L	8	4	4	4	4	4	4	4	5	4	2	4	5	2	3	4	4	5	5	4	4	4	5	5	3
24	P	7	3	3	3	4	4	4	4	5	4	3	4	4	4	4	3	5	4	5	4	2	4	5	5	3
25	L	7	3	4	3	1	2	3	4	3	5	2	4	4	3	3	3	2	3	2	5	4	4	3	3	3
26	L	9	4	4	4	4	4	4	4	4	4	3	4	4	2	3	4	4	4	4	4	4	4	4	4	3
27	P	9	5	5	4	5	4	3	4	3	5	3	5	4	3	3	3	4	4	3	5	2	5	3	5	2
28	L	8	4	1	1	4	4	4	4	3	1	3	4	3	2	4	4	3	4	4	4	3	4	4	4	4
29	L	7	4	4	4	4	5	4	5	4	5	2	4	4	3	4	4	5	4	5	5	3	5	4	5	4
30	L	9	4	4	4	4	4	4	4	4	4	3	4	4	2	3	4	4	5	4	4	4	5	5	5	3
31	L	8	2	3	4	3	3	3	3	3	3	3	3	3	2	3	4	3	3	3	3	3	3	3	4	4
32	L	8	3	3	3	3	3	3	3	3	4	3	3	3	3	3	3	4	3	4	3	2	4	3	3	3
33	L	8	4	5	4	4	5	4	4	4	4	3	4	5	2	4	3	4	5	5	4	4	4	4	4	4
34	L	7	4	4	3	4	3	4	4	4	3	3	4	3	2	3	4	3	4	3	3	4	5	3	4	4
35	L	9	3	3	3	3	3	3	3	3	3	3	3	3	3	3	3	3	3	3	3	2	3	3	3	2
36	L	8	4	5	4	5	4	4	5	4	5	2	4	5	3	3	4	4	5	4	4	4	4	4	4	4
37	P	9	5	5	3	4	3	3	3	3	4	2	3	3	3	3	3	4	4	4	4	3	4	4	4	3
38	P	8	3	3	3	4	4	3	3	4	4	3	5	4	3	3	3	5	3	3	5	4	4	4	4	3
39	P	9	4	4	4	4	4	4	4	4	4	3	4	4	2	4	3	4	4	4	4	2	4	4	4	4
40	P	7	2	2	2	4	4	4	4	4	4	2	4	3	2	3	4	4	4	4	4	4	4	4	4	2
41	P	7	5	5	3	3	5	4	5	4	3	3	3	2	3	4	3	5	4	2	3	2	5	4	3	3
42	P	8	4	4	4	3	4	4	5	4	3	3	4	4	3	3	4	4	4	4	3	4	4	3	4	4
43	P	9	4	4	4	4	4	4	4	4	4	2	4	4	4	4	3	4	4	4	4	4	4	4	4	4
44	P	8	4	4	4	3	4	3	5	5	4	3	4	4	3	3	4	3	4	3	5	3	4	4	5	3
45	P	9	4	4	4	4	4	4	4	4	4	3	4	4	4	4	3	4	4	4	4	4	4	4	4	4
46	P	7	3	3	4	4	4	3	2	4	4	2	4	4	3	3	3	4	4	4	4	4	4	4	4	2
47	P	9	4	3	3	4	4	4	3	4	5	2	4	3	3	3	4	4	5	4	5	4	4	5	4	4
48	P	9	4	4	3	5	4	4	4	5	3	3	4	4	3	4	3	4	5	5	5	4	5	4	4	3
49	L	9	4	3	4	3	4	3	4	3	4	2	4	4	4	4	4	3	4	4	4	3	4	4	4	3
50	P	9	5	5	5	5	5	4	3	3	4	3	4	3	3	3	3	3	4	2	5	3	4	4	4	3
51	P	8	4	3	4	3	4	4	4	4	3	2	4	3	4	4	4	3	3	4	4	3	4	4	4	4
52	P	8	3	4	4	3	5	4	4	5	4	3	5	4	2	3	3	5	4	5	4	4	5	4	3	2
53	L	8	4	4	4	4	4	4	4	4	4	2	4	4	3	4	3	4	3	3	3	4	5	5	5	3
54	L	9	4	5	4	5	1	3	1	1	1	3	1	3	2	3	4	5	4	3	4	4	5	4	4	4
55	L	8	3	5	4	4	4	4	4	4	3	2	4	4	3	4	4	5	5	4	4	4	4	4	4	4
56	P	8	4	4	4	3	5	4	4	4	3	3	4	3	3	3	3	4	5	4	3	3	4	3	3	3
57	L	9	4	4	4	4	4	4	4	4	4	2	4	4	3	4	3	4	4	4	4	4	4	4	4	4
58	P	8	4	3	4	3	3	4	3	4	3	2	3	4	3	3	3	4	3	4	3	4	3	3	3	3
59	L	9	5	5	3	3	5	3	4	3	4	3	4	4	2	4	3	4	4	4	4	4	3	4	4	4
60	L	8	4	4	4	4	4	4	4	4	4	3	4	4	3	4	4	4	4	4	4	4	4	4	4	4
61	P	8	3	3	3	4	4	3	3	3	4	3	4	4	3	3	3	4	4	4	4	4	4	4	4	4
62	L	7	4	4	4	4	4	4	4	4	4	2	4	4	3	4	4	4	4	5	5	4	4	4	4	3
63	L	9	4	4	4	4	3	3	4	4	4	3	4	4	3	3	3	4	4	5	5	4	3	4	4	2
63	L	9	4	4	4	4	3	3	4	4	4	3	4	4	3	3	3	4	4	5	5	4	3	4	4	2
			3.75	3.75	3.59375	3.75	3.98438	3.67188	3.92188	3.82812	3.76562	2.67188	3.84375	3.67188	2.84375	3.3125	3.28125	3.875	4	4	4.14062	3.39062	4.0625	3.79688	4.01562	3.32812

## Sheet: Post
No. Responden	Kelas	Gender	1	2	3	4	5	6	7	8	9	10	11	12	13	14	15	16	17	18	19	20	21	22	23	24
1	7	L	5	5	5	5	5	5	5	5	5	5	5	5	5	5	5	5	5	5	5	5	5	5	5	5
2	9	L	5	5	5	5	5	5	5	5	5	5	5	4	3	5	5	5	5	5	5	4	5	5	5	5
3	9	L	5	4	5	5	5	4	5	4	5	4	5	4	4	5	5	3	5	5	4	5	5	5	4	5
4	9	P	5	4	5	4	3	4	3	3	4	3	3	3	4	3	4	3	3	4	4	4	3	4	5	4
5	7	L	3	3	4	3	4	3	5	4	2	5	4	4	5	5	5	2	4	5	5	3	3	3	4	3
6	9	L	3	4	3	3	3	3	3	3	3	3	4	4	4	4	4	4	4	4	5	4	4	4	4	3
7	7	L	5	3	5	5	3	4	4	4	3	4	4	3	5	4	3	4	5	3	4	4	5	3	3	4
8	7	L	3	5	4	3	4	4	5	2	4	3	5	5	5	4	5	5	5	5	4	4	4	4	4	4
9	8	L	4	3	4	4	3	4	4	3	3	3	3	4	4	3	3	4	3	3	4	3	3	4	3	4
10	9	L	5	5	5	5	5	5	5	5	5	5	5	5	5	5	5	5	5	5	5	5	5	5	5	5
11	8	L	4	4	4	4	4	4	4	4	3	3	4	3	4	4	3	3	3	3	4	4	4	4	4	4
12	9	P	4	4	4	4	4	4	3	4	4	3	4	4	4	4	3	4	3	4	4	4	4	4	4	4
13	8	L	5	5	5	5	5	5	5	4	4	5	5	4	5	5	5	5	5	5	5	5	5	5	5	5
14	9	P	4	4	4	4	5	5	5	5	5	5	4	4	4	5	3	3	3	3	3	3	4	4	4	4
15	8	P	3	3	4	4	4	4	3	4	4	4	3	4	5	3	4	4	4	5	3	4	3	3	3	4
16	9	L	4	4	4	4	3	4	4	4	4	4	4	4	4	4	4	4	4	4	4	4	4	4	4	4
17	8	P	4	4	3	4	3	4	3	4	4	3	4	3	5	3	4	3	4	5	4	3	4	3	4	4
18	9	L	4	4	4	4	4	4	4	4	4	4	4	4	4	4	4	4	4	4	4	4	4	4	4	4
19	7	P	4	4	4	3	3	5	3	4	3	4	4	3	5	4	5	5	4	4	3	3	3	4	3	3
20	7	P	4	4	4	3	3	4	5	3	4	3	4	4	4	4	5	3	3	4	3	5	5	4	4	3
21	7	P	5	5	5	4	5	5	4	5	5	4	5	5	5	5	5	4	5	5	5	5	5	4	5	5
22	7	P	4	4	5	4	4	5	3	4	4	4	4	5	4	5	4	5	4	5	4	5	4	3	5	3
23	8	L	5	5	4	5	5	5	5	5	5	5	5	4	5	5	5	5	5	5	5	5	5	5	5	5
24	7	P	4	4	4	4	4	4	4	4	4	4	4	5	4	4	4	4	5	4	4	4	4	4	4	5
25	7	L	3	4	5	4	4	4	3	4	4	3	3	3	4	3	3	3	4	4	5	5	4	3	4	5
26	9	L	4	4	4	4	4	4	4	4	4	4	4	4	5	4	4	4	4	4	4	4	4	4	4	4
27	9	P	5	5	4	5	5	4	5	5	5	5	5	5	5	3	5	4	3	5	4	3	5	5	4	3
28	8	L	4	4	5	5	5	5	5	5	5	5	5	5	5	5	5	5	5	3	3	4	5	5	5	5
29	7	L	5	3	5	4	5	5	4	5	5	5	5	5	5	5	5	5	5	5	5	5	5	3	5	5
30	9	L	4	4	4	4	4	4	5	5	5	4	4	4	4	4	4	5	5	4	4	4	5	5	4	4
31	8	L	5	4	4	4	4	5	4	4	5	4	4	4	5	4	4	4	5	4	4	4	5	4	4	5
32	8	L	5	5	5	5	5	5	5	5	5	5	5	5	5	5	5	5	5	5	5	5	5	5	5	5
33	8	L	5	5	5	4	4	4	4	4	5	5	5	5	5	5	5	5	5	5	5	5	5	5	5	5
34	7	L	4	4	4	4	4	4	4	4	4	4	4	4	4	4	4	4	4	3	4	3	4	4	4	3
35	9	L	4	4	4	3	4	4	4	4	5	5	5	5	4	3	4	4	4	5	4	4	4	5	4	4
36	7	L	5	5	5	3	4	5	4	4	5	5	5	4	5	5	5	5	4	5	4	5	5	4	4	5
37	9	P	4	4	4	4	4	4	3	3	3	4	4	4	4	4	4	3	4	4	4	4	3	3	4	4
38	8	P	4	4	5	3	3	4	3	4	4	3	4	4	5	4	4	3	4	3	5	3	4	3	3	5
39	9	P	4	4	5	5	4	4	4	4	4	4	4	4	4	4	4	4	4	4	5	4	4	4	5	4
40	7	P	4	5	4	4	4	5	5	4	4	4	4	4	4	4	4	4	4	4	4	4	4	4	4	4
41	7	P	5	5	5	5	5	3	3	5	5	3	5	5	3	3	5	3	4	3	3	3	3	3	4	3
42	8	P	4	4	4	4	5	5	4	4	4	4	4	4	4	4	4	4	4	4	4	4	4	4	4	4
43	9	P	5	4	4	4	4	4	4	4	4	4	4	4	4	4	4	4	4	4	4	4	4	4	4	4
44	8	P	4	4	4	4	3	5	4	4	4	4	4	4	4	4	4	4	4	4	4	3	4	4	4	4
45	9	P	4	4	4	4	4	4	4	4	4	4	4	4	4	4	4	4	4	4	4	4	4	4	4	4
46	7	P	4	3	4	4	4	4	4	4	4	3	4	3	4	3	4	4	4	3	4	4	3	3	4	4
47	9	P	4	3	5	5	3	5	5	5	4	3	4	3	4	3	4	3	3	4	4	3	3	3	4	4
48	9	P	4	4	5	4	4	5	4	5	4	5	4	5	3	3	5	4	4	5	4	4	4	4	4	5
49	9	L	4	4	3	4	4	4	4	4	4	5	4	3	4	4	4	3	4	4	3	4	4	4	3	4
50	9	P	3	3	5	3	3	4	3	3	3	4	3	4	5	3	3	5	4	3	4	4	4	3	5	4
51	8	P	4	4	4	4	3	4	4	4	3	4	4	3	5	4	4	4	4	3	4	5	4	4	4	4
52	8	P	4	4	3	4	4	4	5	4	5	4	5	4	5	5	5	4	4	5	4	3	4	4	5	5
53	8	L	5	5	5	5	5	5	5	5	5	5	5	5	5	5	5	5	5	5	5	5	5	5	5	5
54	9	L	3	3	4	3	5	5	5	3	4	4	3	3	5	3	5	5	3	2	4	3	4	5	4	5
55	8	L	5	4	5	4	5	5	5	4	4	5	5	5	5	5	5	4	5	5	5	4	5	3	5	5
56	8	P	3	4	3	3	4	4	4	4	3	4	4	3	4	4	4	4	4	3	4	4	4	3	3	4
57	9	L	4	3	4	4	4	4	4	4	4	5	4	4	4	4	5	4	4	4	4	4	4	5	4	5
58	8	P	4	4	3	5	3	3	3	5	3	4	3	3	3	3	3	4	3	3	4	4	3	4	3	4
59	9	L	4	3	4	4	4	4	4	4	4	4	3	3	4	4	4	4	4	4	4	3	3	4	4	4
60	8	L	4	3	4	4	5	4	3	4	4	4	4	4	4	4	3	4	4	4	5	4	5	5	4	4
61	8	P	5	5	5	4	5	5	4	4	5	5	4	5	3	3	4	5	3	4	5	3	4	3	5	4
62	7	L	5	4	4	5	4	4	4	4	4	5	4	4	4	4	4	4	4	4	4	5	5	4	4	4
63	9	L	4	4	3	4	4	5	4	4	4	5	4	4	4	5	3	5	4	4	4	4	4	5	4	4
			4.20635	4.04762	4.26984	4.07937	4.07937	4.31746	4.09524	4.11111	4.12698	4.14286	4.1746	4.04762	4.33333	4.06349	4.22222	4.07937	4.11111	4.11111	4.1746	4.01587	4.15873	4.01587	4.15873	4.22222

## Sheet: Item
	Pre-test	Post-test
1. Saya lebih memilih makanan lokal karena menghasilkan jejak karbon yang lebih rendah.	3.75	4.20635
2. Saya lebih memilih makanan lokal karena menghasilkan jejak karbon yang lebih rendah.	3.75	4.04762
3. Saya memahami bahwa makanan impor berkontribusi lebih besar terhadap emisi karbon.	3.59375	4.26984
4. Saya berusaha mengurangi konsumsi makanan kemasan atau olahan dari luar pulau.	3.75	4.07937
5. Saya mulai membiasakan diri mengonsumsi makanan segar hasil produksi lokal.	3.98438	4.07937
6. Saya mendiskusikan dampak lingkungan dari pilihan makanan bersama keluarga.	3.67188	4.31746
7. Saya tahu bahwa energi matahari adalah sumber energi terbarukan yang ramah lingkungan.	3.92188	4.09524
8. Saya tertarik menggunakan alat bertenaga surya dalam kehidupan sehari-hari.	3.82812	4.11111
9. Saya menyadari pentingnya mengurangi penggunaan listrik berbasis bahan bakar fosil.	3.76562	4.12698
10. Saya mengetahui cara kerja dasar panel surya untuk menghasilkan listrik.	2.67188	4.14286
11. Saya berusaha menghemat listrik di rumah untuk menjaga lingkungan.	3.84375	4.1746
12. Saya mendukung penggunaan energi surya di daerah saya sebagai alternatif energi.	3.67188	4.04762
13. Saya memilah sampah organik dan anorganik setiap hari.	2.84375	4.33333
14. Saya memahami cara kerja bank sampah dan fungsinya bagi lingkungan.	3.3125	4.06349
15. Saya tahu bahwa sampah organik bisa diolah menjadi kompos melalui biokonversi.	3.28125	4.22222
16. Saya merasa bertanggung jawab untuk mengurangi sampah rumah tangga.	3.875	4.07937
17. Saya tertarik mengikuti kegiatan pengolahan sampah menjadi pupuk atau bahan berguna.	4	4.11111
18. Saya menyadari bahwa pembakaran sampah merusak lingkungan dan kesehatan.	4	4.11111
19. Saya menyadari pentingnya menjaga kebersihan sumber air di lingkungan saya.	4.14062	4.1746
20. Saya tahu cara sederhana untuk menyaring air menggunakan bahan alami.	3.39062	4.01587
21. Saya memahami bahwa air bersih harus dikelola dan digunakan secara hemat.	4.0625	4.15873
22. Saya tidak membuang limbah atau deterjen ke saluran air umum.	3.79688	4.01587
23. Saya terbiasa menutup kran saat tidak digunakan.	4.01562	4.15873
24. Saya percaya bahwa teknologi tradisional bisa membantu penyediaan air bersih di pulau.	3.32812	4.22222
Item Pernyataan	Pre-test	Post-test
1	3.75	4.20635
2	3.75	4.04762
3	3.59375	4.26984
4	3.75	4.07937
5	3.98438	4.07937
6	3.67188	4.31746
7	3.92188	4.09524
8	3.82812	4.11111
9	3.76562	4.12698
10	2.67188	4.14286
11	3.84375	4.1746
12	3.67188	4.04762
13	2.84375	4.33333
14	3.3125	4.06349
15	3.28125	4.22222
16	3.875	4.07937
17	4	4.11111
18	4	4.11111
19	4.14062	4.1746
20	3.39062	4.01587
21	4.0625	4.15873
22	3.79688	4.01587
23	4.01562	4.15873
24	3.32812	4.22222

## Sheet: %Pre
Column1	Column2	Column3	Column4	Column5	Column6	Column7	Column8	Column9	Column10	Column11	Column12	Column13	Column14	Column15	Column16	Column17	Column18	Column19	Column20	Column21	Column22	Column23	Column24	Column25	Column26	Column27	Column28	Column29	Column30	Column31	Column32
No. Responden	Gender	Kelas	1	2	3	4	5	6		7	8	9	10	11	12		13	14	15	16	17	18		19	20	21	22	23	24		Rata2
1	L	8	5	5	4	5	5	4	93	4	4	5	2	5	5	83	3	4	3	5	5	5	83	4	4	5	5	5	4	90	87.5
2	L	9	5	4	4	5	4	4	87	4	5	5	4	4	5	90	3	2	4	5	5	4	77	4	4	5	5	5	3	87	85
3	L	9	4	4	4	4	5	4	83	5	4	4	2	5	4	80	4	4	3	4	5	4	80	5	4	5	4	5	4	90	83.3333
4	P	9	3	3	4	2	3	4	63	5	4	4	2	3	3	70	3	2	2	5	5	4	70	5	1	4	1	5	3	63	66.6667
5	L	7	1	4	4	4	4	4	70	5	5	2	4	1	2	63	1	4	2	2	2	5	53	3	2	1	4	1	4	50	59.1667
6	L	9	4	4	4	4	4	4	80	4	4	4	2	3	3	67	3	3	3	3	3	3	60	3	2	3	3	3	3	57	65.8333
7	L	7	3	3	3	3	5	4	70	4	4	3	3	4	5	77	3	3	3	4	4	5	73	5	3	4	3	3	2	67	71.6667
8	L	7	4	3	4	4	3	3	70	5	5	4	4	2	1	70	2	3	4	2	3	5	63	5	4	3	3	3	4	73	69.1667
9	L	8	3	3	3	3	3	3	60	3	3	3	3	3	3	60	3	3	2	3	3	3	57	3	3	3	3	3	3	60	59.1667
10	L	9	5	4	4	4	5	4	87	5	4	5	2	5	4	83	3	3	3	4	4	5	73	5	4	4	5	5	3	87	82.5
11	L	8	3	3	3	3	3	3	60	3	3	3	3	4	3	63	4	3	3	4	4	3	70	4	4	3	3	3	3	67	65
12	P	8	3	3	3	3	4	3	63	3	2	4	2	5	3	63	3	3	3	5	5	5	80	5	2	5	1	5	3	70	69.1667
13	L	8	5	5	4	5	5	4	93	4	4	4	2	4	4	73	3	3	3	4	5	5	77	5	4	5	5	5	5	97	85
14	P	9	4	4	3	4	4	4	77	4	4	4	4	4	4	80	4	4	2	4	4	4	73	4	4	4	4	4	4	80	77.5
15	P	8	3	3	3	3	4	3	63	4	3	3	3	4	3	67	3	3	3	3	3	4	63	5	3	3	3	3	3	67	65
16	L	9	3	3	2	2	5	4	63	4	4	4	4	5	4	83	2	3	3	4	4	4	67	4	4	4	4	4	4	80	73.3333
17	P	8	3	3	3	3	4	3	63	5	4	3	3	3	3	70	2	3	3	4	4	3	63	4	2	4	4	3	3	67	65.8333
18	L	9	4	3	3	4	4	4	73	4	4	4	2	4	4	73	2	3	4	4	4	4	70	4	4	4	4	4	4	80	74.1667
19	P	8	3	3	4	4	4	4	73	4	4	3	3	4	4	73	3	2	3	3	4	5	67	5	2	5	3	5	2	73	71.6667
20	P	7	2	3	4	3	5	4	70	3	3	3	3	4	3	63	4	4	2	5	4	3	73	3	4	5	3	5	4	80	71.6667
21	P	7	5	4	4	5	5	4	90	5	4	5	2	3	4	77	2	3	4	1	3	5	60	5	3	5	4	5	4	87	78.3333
22	P	7	5	5	4	5	5	4	93	5	5	5	2	5	4	87	3	4	4	5	5	5	87	5	3	5	5	5	4	90	89.1667
23	L	8	4	4	4	4	4	4	80	4	5	4	2	4	5	80	2	3	4	4	5	5	77	4	4	4	5	5	3	83	80
24	P	7	3	3	3	4	4	4	70	4	5	4	3	4	4	80	4	4	3	5	4	5	83	4	2	4	5	5	3	77	77.5
25	L	7	3	4	3	1	2	3	53	4	3	5	2	4	4	73	3	3	3	2	3	2	53	5	4	4	3	3	3	73	63.3333
26	L	9	4	4	4	4	4	4	80	4	4	4	3	4	4	77	2	3	4	4	4	4	70	4	4	4	4	4	3	77	75.8333
27	P	9	5	5	4	5	4	3	87	4	3	5	3	5	4	80	3	3	3	4	4	3	67	5	2	5	3	5	2	73	76.6667
28	L	8	4	1	1	4	4	4	60	4	3	1	3	4	3	60	2	4	4	3	4	4	70	4	3	4	4	4	4	77	66.6667
29	L	7	4	4	4	4	5	4	83	5	4	5	2	4	4	80	3	4	4	5	4	5	83	5	3	5	4	5	4	87	83.3333
30	L	9	4	4	4	4	4	4	80	4	4	4	3	4	4	77	2	3	4	4	5	4	73	4	4	5	5	5	3	87	79.1667
31	L	8	2	3	4	3	3	3	60	3	3	3	3	3	3	60	2	3	4	3	3	3	60	3	3	3	3	4	4	67	61.6667
32	L	8	3	3	3	3	3	3	60	3	3	4	3	3	3	63	3	3	3	4	3	4	67	3	2	4	3	3	3	60	62.5
33	L	8	4	5	4	4	5	4	87	4	4	4	3	4	5	80	2	4	3	4	5	5	77	4	4	4	4	4	4	80	80.8333
34	L	7	4	4	3	4	3	4	73	4	4	3	3	4	3	70	2	3	4	3	4	3	63	3	4	5	3	4	4	77	70.8333
35	L	9	3	3	3	3	3	3	60	3	3	3	3	3	3	60	3	3	3	3	3	3	60	3	2	3	3	3	2	53	58.3333
36	L	8	4	5	4	5	4	4	87	5	4	5	2	4	5	83	3	3	4	4	5	4	77	4	4	4	4	4	4	80	81.6667
37	P	9	5	5	3	4	3	3	77	3	3	4	2	3	3	60	3	3	3	4	4	4	70	4	3	4	4	4	3	73	70
38	P	8	3	3	3	4	4	3	67	3	4	4	3	5	4	77	3	3	3	5	3	3	67	5	4	4	4	4	3	80	72.5
39	P	9	4	4	4	4	4	4	80	4	4	4	3	4	4	77	2	4	3	4	4	4	70	4	2	4	4	4	4	73	75
40	P	7	2	2	2	4	4	4	60	4	4	4	2	4	3	70	2	3	4	4	4	4	70	4	4	4	4	4	2	73	68.3333
41	P	7	5	5	3	3	5	4	83	5	4	3	3	3	2	67	3	4	3	5	4	2	70	3	2	5	4	3	3	67	71.6667
42	P	8	4	4	4	3	4	4	77	5	4	3	3	4	4	77	3	3	4	4	4	4	73	3	4	4	3	4	4	73	75
43	P	9	4	4	4	4	4	4	80	4	4	4	2	4	4	73	4	4	3	4	4	4	77	4	4	4	4	4	4	80	77.5
44	P	8	4	4	4	3	4	3	73	5	5	4	3	4	4	83	3	3	4	3	4	3	67	5	3	4	4	5	3	80	75.8333
45	P	9	4	4	4	4	4	4	80	4	4	4	3	4	4	77	4	4	3	4	4	4	77	4	4	4	4	4	4	80	78.3333
46	P	7	3	3	4	4	4	3	70	2	4	4	2	4	4	67	3	3	3	4	4	4	70	4	4	4	4	4	2	73	70
47	P	9	4	3	3	4	4	4	73	3	4	5	2	4	3	70	3	3	4	4	5	4	77	5	4	4	5	4	4	87	76.6667
48	P	9	4	4	3	5	4	4	80	4	5	3	3	4	4	77	3	4	3	4	5	5	80	5	4	5	4	4	3	83	80
49	L	9	4	3	4	3	4	3	70	4	3	4	2	4	4	70	4	4	4	3	4	4	77	4	3	4	4	4	3	73	72.5
50	P	9	5	5	5	5	5	4	97	3	3	4	3	4	3	67	3	3	3	3	4	2	60	5	3	4	4	4	3	77	75
51	P	8	4	3	4	3	4	4	73	4	4	3	2	4	3	67	4	4	4	3	3	4	73	4	3	4	4	4	4	77	72.5
52	P	8	3	4	4	3	5	4	77	4	5	4	3	5	4	83	2	3	3	5	4	5	73	4	4	5	4	3	2	73	76.6667
53	L	8	4	4	4	4	4	4	80	4	4	4	2	4	4	73	3	4	3	4	3	3	67	3	4	5	5	5	3	83	75.8333
54	L	9	4	5	4	5	1	3	73	1	1	1	3	1	3	33	2	3	4	5	4	3	70	4	4	5	4	4	4	83	65
55	L	8	3	5	4	4	4	4	80	4	4	3	2	4	4	70	3	4	4	5	5	4	83	4	4	4	4	4	4	80	78.3333
56	P	8	4	4	4	3	5	4	80	4	4	3	3	4	3	70	3	3	3	4	5	4	73	3	3	4	3	3	3	63	71.6667
57	L	9	4	4	4	4	4	4	80	4	4	4	2	4	4	73	3	4	3	4	4	4	73	4	4	4	4	4	4	80	76.6667
58	P	8	4	3	4	3	3	4	70	3	4	3	2	3	4	63	3	3	3	4	3	4	67	3	4	3	3	3	3	63	65.8333
59	L	9	5	5	3	3	5	3	80	4	3	4	3	4	4	73	2	4	3	4	4	4	70	4	4	3	4	4	4	77	75
60	L	8	4	4	4	4	4	4	80	4	4	4	3	4	4	77	3	4	4	4	4	4	77	4	4	4	4	4	4	80	78.3333
61	P	8	3	3	3	4	4	3	67	3	3	4	3	4	4	70	3	3	3	4	4	4	70	4	4	4	4	4	4	80	71.6667
62	L	7	4	4	4	4	4	4	80	4	4	4	2	4	4	73	3	4	4	4	4	5	80	5	4	4	4	4	3	80	78.3333
63	L	9	4	4	4	4	3	3	73	4	4	4	3	4	4	77	3	3	3	4	4	5	73	5	4	3	4	4	2	73	74.1667
									75							72							71							76	73.5317

## Sheet: %Post
Column1	Column2	Column3	Column4	Column5	Column6	Column7	Column8	Column9	Column10	Column11	Column12	Column13	Column14	Column15	Column16	Column17	Column18	Column19	Column20	Column21	Column22	Column23	Column24	Column25	Column26	Column27	Column28	Column29	Column30	Column31	Column32
No. Responden	Kelas	Gender	1	2	3	4	5	6		7	8	9	10	11	12		13	14	15	16	17	18		19	20	21	22	23	24		Rata2
1	8	L	5	5	5	5	5	5	100	5	5	5	5	5	5	100	5	5	5	5	5	5	100	5	5	5	5	5	5	100	100
2	9	L	5	5	5	5	5	5	100	5	5	5	5	5	4	96.6667	3	5	5	5	5	5	93.3333	5	4	5	5	5	5	96.6667	96.6667
3	9	L	5	4	5	5	5	4	93.3333	5	4	5	4	5	4	90	4	5	5	3	5	5	90	4	5	5	5	4	5	93.3333	91.6667
4	9	P	5	4	5	4	3	4	83.3333	3	3	4	3	3	3	63.3333	4	3	4	3	3	4	70	4	4	3	4	5	4	80	74.1667
5	7	L	3	3	4	3	4	3	66.6667	5	4	2	5	4	4	80	5	5	5	2	4	5	86.6667	5	3	3	3	4	3	70	75.8333
6	9	L	3	4	3	3	3	3	63.3333	3	3	3	3	4	4	66.6667	4	4	4	4	4	4	80	5	4	4	4	4	3	80	72.5
7	7	L	5	3	5	5	3	4	83.3333	4	4	3	4	4	3	73.3333	5	4	3	4	5	3	80	4	4	5	3	3	4	76.6667	78.3333
8	7	L	3	5	4	3	4	4	76.6667	5	2	4	3	5	5	80	5	4	5	5	5	5	96.6667	4	4	4	4	4	4	80	83.3333
9	8	L	4	3	4	4	3	4	73.3333	4	3	3	3	3	4	66.6667	4	3	3	4	3	3	66.6667	4	3	3	4	3	4	70	69.1667
10	9	L	5	5	5	5	5	5	100	5	5	5	5	5	5	100	5	5	5	5	5	5	100	5	5	5	5	5	5	100	100
11	8	L	4	4	4	4	4	4	80	4	4	3	3	4	3	70	4	4	3	3	3	3	66.6667	4	4	4	4	4	4	80	74.1667
12	8	P	4	4	4	4	4	4	80	3	4	4	3	4	4	73.3333	4	4	3	4	3	4	73.3333	4	4	4	4	4	4	80	76.6667
13	8	L	5	5	5	5	5	5	100	5	4	4	5	5	4	90	5	5	5	5	5	5	100	5	5	5	5	5	5	100	97.5
14	9	P	4	4	4	4	5	5	86.6667	5	5	5	5	4	4	93.3333	4	5	3	3	3	3	70	3	3	4	4	4	4	73.3333	80.8333
15	8	P	3	3	4	4	4	4	73.3333	3	4	4	4	3	4	73.3333	5	3	4	4	4	5	83.3333	3	4	3	3	3	4	66.6667	74.1667
16	9	L	4	4	4	4	3	4	76.6667	4	4	4	4	4	4	80	4	4	4	4	4	4	80	4	4	4	4	4	4	80	79.1667
17	8	P	4	4	3	4	3	4	73.3333	3	4	4	3	4	3	70	5	3	4	3	4	5	80	4	3	4	3	4	4	73.3333	74.1667
18	9	L	4	4	4	4	4	4	80	4	4	4	4	4	4	80	4	4	4	4	4	4	80	4	4	4	4	4	4	80	80
19	8	P	4	4	4	3	3	5	76.6667	3	4	3	4	4	3	70	5	4	5	5	4	4	90	3	3	3	4	3	3	63.3333	75
20	7	P	4	4	4	3	3	4	73.3333	5	3	4	3	4	4	76.6667	4	4	5	3	3	4	76.6667	3	5	5	4	4	3	80	76.6667
21	7	P	5	5	5	4	5	5	96.6667	4	5	5	4	5	5	93.3333	5	5	5	4	5	5	96.6667	5	5	5	4	5	5	96.6667	95.8333
22	7	P	4	4	5	4	4	5	86.6667	3	4	4	4	4	5	80	4	5	4	5	4	5	90	4	5	4	3	5	3	80	84.1667
23	8	L	5	5	4	5	5	5	96.6667	5	5	5	5	5	4	96.6667	5	5	5	5	5	5	100	5	5	5	5	5	5	100	98.3333
24	7	P	4	4	4	4	4	4	80	4	4	4	4	4	5	83.3333	4	4	4	4	5	4	83.3333	4	4	4	4	4	5	83.3333	82.5
25	7	L	3	4	5	4	4	4	80	3	4	4	3	3	3	66.6667	4	3	3	3	4	4	70	5	5	4	3	4	5	86.6667	75.8333
26	9	L	4	4	4	4	4	4	80	4	4	4	4	4	4	80	5	4	4	4	4	4	83.3333	4	4	4	4	4	4	80	80.8333
27	9	P	5	5	4	5	5	4	93.3333	5	5	5	5	5	5	100	5	3	5	4	3	5	83.3333	4	3	5	5	4	3	80	89.1667
28	8	L	4	4	5	5	5	5	93.3333	5	5	5	5	5	5	100	5	5	5	5	5	3	93.3333	3	4	5	5	5	5	90	94.1667
29	7	L	5	3	5	4	5	5	90	4	5	5	5	5	5	96.6667	5	5	5	5	5	5	100	5	5	5	3	5	5	93.3333	95
30	9	L	4	4	4	4	4	4	80	5	5	5	4	4	4	90	4	4	4	5	5	4	86.6667	4	4	5	5	4	4	86.6667	85.8333
31	8	L	5	4	4	4	4	5	86.6667	4	4	5	4	4	4	83.3333	5	4	4	4	5	4	86.6667	4	4	5	4	4	5	86.6667	85.8333
32	8	L	5	5	5	5	5	5	100	5	5	5	5	5	5	100	5	5	5	5	5	5	100	5	5	5	5	5	5	100	100
33	8	L	5	5	5	4	4	4	90	4	4	5	5	5	5	93.3333	5	5	5	5	5	5	100	5	5	5	5	5	5	100	95.8333
34	7	L	4	4	4	4	4	4	80	4	4	4	4	4	4	80	4	4	4	4	4	3	76.6667	4	3	4	4	4	3	73.3333	77.5
35	9	L	4	4	4	3	4	4	76.6667	4	4	5	5	5	5	93.3333	4	3	4	4	4	5	80	4	4	4	5	4	4	83.3333	83.3333
36	8	L	5	5	5	3	4	5	90	4	4	5	5	5	4	90	5	5	5	5	4	5	96.6667	4	5	5	4	4	5	90	91.6667
37	9	P	4	4	4	4	4	4	80	3	3	3	4	4	4	70	4	4	4	3	4	4	76.6667	4	4	3	3	4	4	73.3333	75
38	8	P	4	4	5	3	3	4	76.6667	3	4	4	3	4	4	73.3333	5	4	4	3	4	3	76.6667	5	3	4	3	3	5	76.6667	75.8333
39	9	P	4	4	5	5	4	4	86.6667	4	4	4	4	4	4	80	4	4	4	4	4	4	80	5	4	4	4	5	4	86.6667	83.3333
40	7	P	4	5	4	4	4	5	86.6667	5	4	4	4	4	4	83.3333	4	4	4	4	4	4	80	4	4	4	4	4	4	80	82.5
41	7	P	5	5	5	5	5	3	93.3333	3	5	5	3	5	5	86.6667	3	3	5	3	4	3	70	3	3	3	3	4	3	63.3333	78.3333
42	8	P	4	4	4	4	5	5	86.6667	4	4	4	4	4	4	80	4	4	4	4	4	4	80	4	4	4	4	4	4	80	81.6667
43	9	P	5	4	4	4	4	4	83.3333	4	4	4	4	4	4	80	4	4	4	4	4	4	80	4	4	4	4	4	4	80	80.8333
44	8	P	4	4	4	4	3	5	80	4	4	4	4	4	4	80	4	4	4	4	4	4	80	4	3	4	4	4	4	76.6667	79.1667
45	9	P	4	4	4	4	4	4	80	4	4	4	4	4	4	80	4	4	4	4	4	4	80	4	4	4	4	4	4	80	80
46	7	P	4	3	4	4	4	4	76.6667	4	4	4	3	4	3	73.3333	4	3	4	4	4	3	73.3333	4	4	3	3	4	4	73.3333	74.1667
47	9	P	4	3	5	5	3	5	83.3333	5	5	4	3	4	3	80	4	3	4	3	3	4	70	4	3	3	3	4	4	70	75.8333
48	9	P	4	4	5	4	4	5	86.6667	4	5	4	5	4	5	90	3	3	5	4	4	5	80	4	4	4	4	4	5	83.3333	85
49	9	L	4	4	3	4	4	4	76.6667	4	4	4	5	4	3	80	4	4	4	3	4	4	76.6667	3	4	4	4	3	4	73.3333	76.6667
50	9	P	3	3	5	3	3	4	70	3	3	3	4	3	4	66.6667	5	3	3	5	4	3	76.6667	4	4	4	3	5	4	80	73.3333
51	8	P	4	4	4	4	3	4	76.6667	4	4	3	4	4	3	73.3333	5	4	4	4	4	3	80	4	5	4	4	4	4	83.3333	78.3333
52	8	P	4	4	3	4	4	4	76.6667	5	4	5	4	5	4	90	5	5	5	4	4	5	93.3333	4	3	4	4	5	5	83.3333	85.8333
53	8	L	5	5	5	5	5	5	100	5	5	5	5	5	5	100	5	5	5	5	5	5	100	5	5	5	5	5	5	100	100
54	9	L	3	3	4	3	5	5	76.6667	5	3	4	4	3	3	73.3333	5	3	5	5	3	2	76.6667	4	3	4	5	4	5	83.3333	77.5
55	8	L	5	4	5	4	5	5	93.3333	5	4	4	5	5	5	93.3333	5	5	5	4	5	5	96.6667	5	4	5	3	5	5	90	93.3333
56	8	P	3	4	3	3	4	4	70	4	4	3	4	4	3	73.3333	4	4	4	4	4	3	76.6667	4	4	4	3	3	4	73.3333	73.3333
57	9	L	4	3	4	4	4	4	76.6667	4	4	4	5	4	4	83.3333	4	4	5	4	4	4	83.3333	4	4	4	5	4	5	86.6667	82.5
58	8	P	4	4	3	5	3	3	73.3333	3	5	3	4	3	3	70	3	3	3	4	3	3	63.3333	4	4	3	4	3	4	73.3333	70
59	9	L	4	3	4	4	4	4	76.6667	4	4	4	4	3	3	73.3333	4	4	4	4	4	4	80	4	3	3	4	4	4	73.3333	75.8333
60	8	L	4	3	4	4	5	4	80	3	4	4	4	4	4	76.6667	4	4	3	4	4	4	76.6667	5	4	5	5	4	4	90	80.8333
61	8	P	5	5	5	4	5	5	96.6667	4	4	5	5	4	5	90	3	3	4	5	3	4	73.3333	5	3	4	3	5	4	80	85
62	7	L	5	4	4	5	4	4	86.6667	4	4	4	5	4	4	83.3333	4	4	4	4	4	4	80	4	5	5	4	4	4	86.6667	84.1667
63	9	L	4	4	3	4	4	5	80	4	4	4	5	4	4	83.3333	4	5	3	5	4	4	83.3333	4	4	4	5	4	4	83.3333	82.5
									83.3333							82.328							83.0688							82.4868	82.8042
Aspect	Pre-EA	Post-EA	N-Gain	Kategori
consumption and carbon footprint	75	83	0.32	Moderate
renewable energy	72	82	0.357143	Moderate
waste management	71	83	0.413793	Moderate
water conservation	76	82.5	0.270833	Low
Mean	73.53	82.8	0.350208	Moderate
